# Supplementary material for: Parental Vaccine Preferences for Their Children in China: A Discrete Choice Experiment
Source: Vaccines (Basel). 2020 Nov 16;8(4):687. doi: 10.3390/vaccines8040687 (PMC7712304; doi:10.3390/vaccines8040687)
Supplement: Supplementary file 1 [file vaccines-08-00687-s001.pdf]

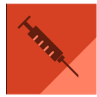

## Article

# Parental vaccine preferences for their children in China: A discrete choice experiment

Tiantian Gong <sup>1,2</sup>, Gang Chen <sup>3</sup>, Ping Liu <sup>1,2</sup>, Xiaozhen Lai <sup>4</sup>, Hongguo Rong <sup>5</sup>, Xiaochen Ma <sup>5</sup>, Zhiyuan Hou <sup>6</sup>, Hai Fang <sup>5,7,8,\*</sup>, Shunping Li <sup>1,2,\*</sup>

## Supplementary Materials:

**Table S1.** Mixed logit model results for the severity of diseases coded for dummy variables.

| Attributes                                                     |           | SE <sup>†</sup> | SD       | SE <sup>‡</sup> |
|----------------------------------------------------------------|-----------|-----------------|----------|-----------------|
| Non-vaccination                                                | -2.982*** | 0.442           | 4.436*** | 0.409           |
| Protection rate prevented by a vaccine (ref: 65%)              |           |                 |          |                 |
| 80%                                                            | 0.486***  | 0.075           | 0.025    | 0.147           |
| 95%                                                            | 1.168***  | 0.085           | 0.533*** | 0.135           |
| Risk of severe side effect event (ref: high)                   |           |                 |          |                 |
| moderate                                                       | 0.799***  | 0.078           | 0.131    | 0.269           |
| low                                                            | 1.662***  | 0.117           | 1.398*** | 0.116           |
| Location of vaccine manufacturer (ref: domestic)               |           |                 |          |                 |
| Imported                                                       | -0.154*   | 0.063           | 0.741*** | 0.088           |
| Duration of vaccine-induced protection (ref:1 year)            |           |                 |          |                 |
| 5 years                                                        | 0.296***  | 0.072           | 0.031    | 0.125           |
| 10 years                                                       | 0.598***  | 0.092           | 0.881*** | 0.119           |
| Severity of diseases prevented by vaccines (ref: 1% mortality) |           |                 |          |                 |
| 5% mortality                                                   | 0.148     | 0.092           | 0.093    | 0.297           |
| 10% mortality                                                  | 0.161     | 0.090           | 0.723*** | 0.142           |
| 15% mortality                                                  | 0.085     | 0.107           | 1.263*** | 0.126           |
| Out-of-pocket Cost                                             | -0.001*** | 0.000           | 0.003*** | 0.000           |
| Log likelihood                                                 |           | -3070.294       |          |                 |
| AIC                                                            |           | 6188.588        |          |                 |
| BIC                                                            |           | 6367.635        |          |                 |
| Respondents, n                                                 |           | 428             |          |                 |
| Observations, n                                                |           | 12840           |          |                 |

Note: 1. —coefficient, SE<sup>†</sup>—standard error of coefficient, SD—standard deviation, SE<sup>‡</sup>—standard error of SD, ref—reference, AIC—Akaike information criterion, BIC—Bayesian information criterion. All attributes except for cost were coded as dummy variables. 2. A total of 598 parents enrolled in the survey and 580 completed the majority of the questionnaire. Respondents (428) who passed the consistency test were included in the main effects DCE result reported in this table. 3. \* $p < 0.05$ ; \*\* $p < 0.01$ ; \*\*\* $p < 0.001$ .

**Table S2.** Conditional logit model results with only the main effects.

| Attributes                                       |        | SE    | P-value | 95% CI |        |
|--------------------------------------------------|--------|-------|---------|--------|--------|
| Non-vaccination                                  | -0.190 | 0.154 | 0.217   | -0.490 | 0.111  |
| Protection rate prevented by a vaccine (ref:65%) |        |       |         |        |        |
| 80%                                              | 0.388  | 0.052 | <0.001  | 0.285  | 0.490  |
| 95%                                              | 0.791  | 0.060 | <0.001  | 0.674  | 0.908  |
| Risk of severe side effect event (ref: high)     |        |       |         |        |        |
| Moderate                                         | 0.530  | 0.056 | <0.001  | 0.421  | 0.640  |
| Low                                              | 1.029  | 0.075 | <0.001  | 0.881  | 1.177  |
| Location of vaccine manufacturer (ref: domestic) |        |       |         |        |        |
| Imported                                         | -0.122 | 0.043 | 0.004   | -0.206 | -0.038 |

|                                                     |        |       |           |        |        |
|-----------------------------------------------------|--------|-------|-----------|--------|--------|
| Duration of vaccine-induced protection (ref:1 year) |        |       |           |        |        |
| 5 years                                             | 0.163  | 0.048 | 0.001     | 0.069  | 0.256  |
| 10 years                                            | 0.397  | 0.065 | <0.001    | 0.270  | 0.524  |
| Out-of-pocket Cost                                  | -0.001 | 0.000 | 0.003     | -0.002 | -0.001 |
| Severity of diseases prevented by vaccines (per 1%) | 0.006  | 0.007 | 0.353     | -0.007 | 0.019  |
| Log likelihood                                      |        |       | -3800.979 |        |        |
| AIC                                                 |        |       | 7621.958  |        |        |
| BIC                                                 |        |       | 7696.561  |        |        |
| Respondents, n                                      |        |       | 428       |        |        |
| Observations, n                                     |        |       | 12840     |        |        |

Note: 1. CI—confidence interval. All attributes except for cost and severity of diseases prevented by vaccines were coded as dummy variables. 2. A total of 598 parents enrolled in the survey and 580 completed the majority of the questionnaire. Respondents (428) who passed the consistency test were included in the main effects DCE result reported in this table.

**Table S3.** Mixed logit model results for the full sample

| Attributes                                           |           | SE    | SD        | SE    |
|------------------------------------------------------|-----------|-------|-----------|-------|
| Non-vaccination                                      | -2.397*** | 0.285 | 3.861***  | 0.266 |
| Protection rate prevented by a vaccine (ref: 65%)    |           |       |           |       |
| 80%                                                  | 0.558***  | 0.060 | 0.008     | 0.130 |
| 95%                                                  | 1.090***  | 0.069 | 0.618***  | 0.097 |
| Risk of severe side effect event (ref: high)         |           |       |           |       |
| moderate                                             | 0.652***  | 0.061 | 0.070     | 0.214 |
| low                                                  | 1.386***  | 0.087 | 1.267***  | 0.090 |
| Location of vaccine manufacturer (ref: domestic)     |           |       |           |       |
| Imported                                             | -0.122**  | 0.043 | 0.659***  | 0.071 |
| Duration of vaccine-induced protection (ref: 1 year) |           |       |           |       |
| 5 years                                              | 0.229***  | 0.058 | 0.015     | 0.123 |
| 10 years                                             | 0.507***  | 0.070 | 0.731***  | 0.093 |
| Out-of-pocket Cost                                   | -0.001*** | 0.000 | 0.003***  | 0.000 |
| Severity of diseases prevented by vaccines (per 1%)  | 0.014     | 0.008 | 0.140***  | 0.010 |
| Log likelihood                                       |           |       | -4414.636 |       |
| AIC                                                  |           |       | 8869.272  |       |
| BIC                                                  |           |       | 9024.557  |       |
| Respondents, n                                       |           |       | 580       |       |
| Observations, n                                      |           |       | 17400     |       |

Note: 1. All attributes except for cost and severity of diseases prevented by vaccines were coded as dummy variables. 2. A total of 598 parents enrolled in the survey. 580 parents completed the majority of the questionnaire and were included in the main effects DCE result reported in this table. 3. \* $p < 0.05$ ; \*\* $p < 0.01$ ; \*\*\* $p < 0.001$ .
